# Supplementary material
Source: MDPI journal article supplement (https://www.mdpi.com/2071-1050/14/1/25)
Supplement: s1 [file s1 › sustainability-1512869-supplementary.pdf]

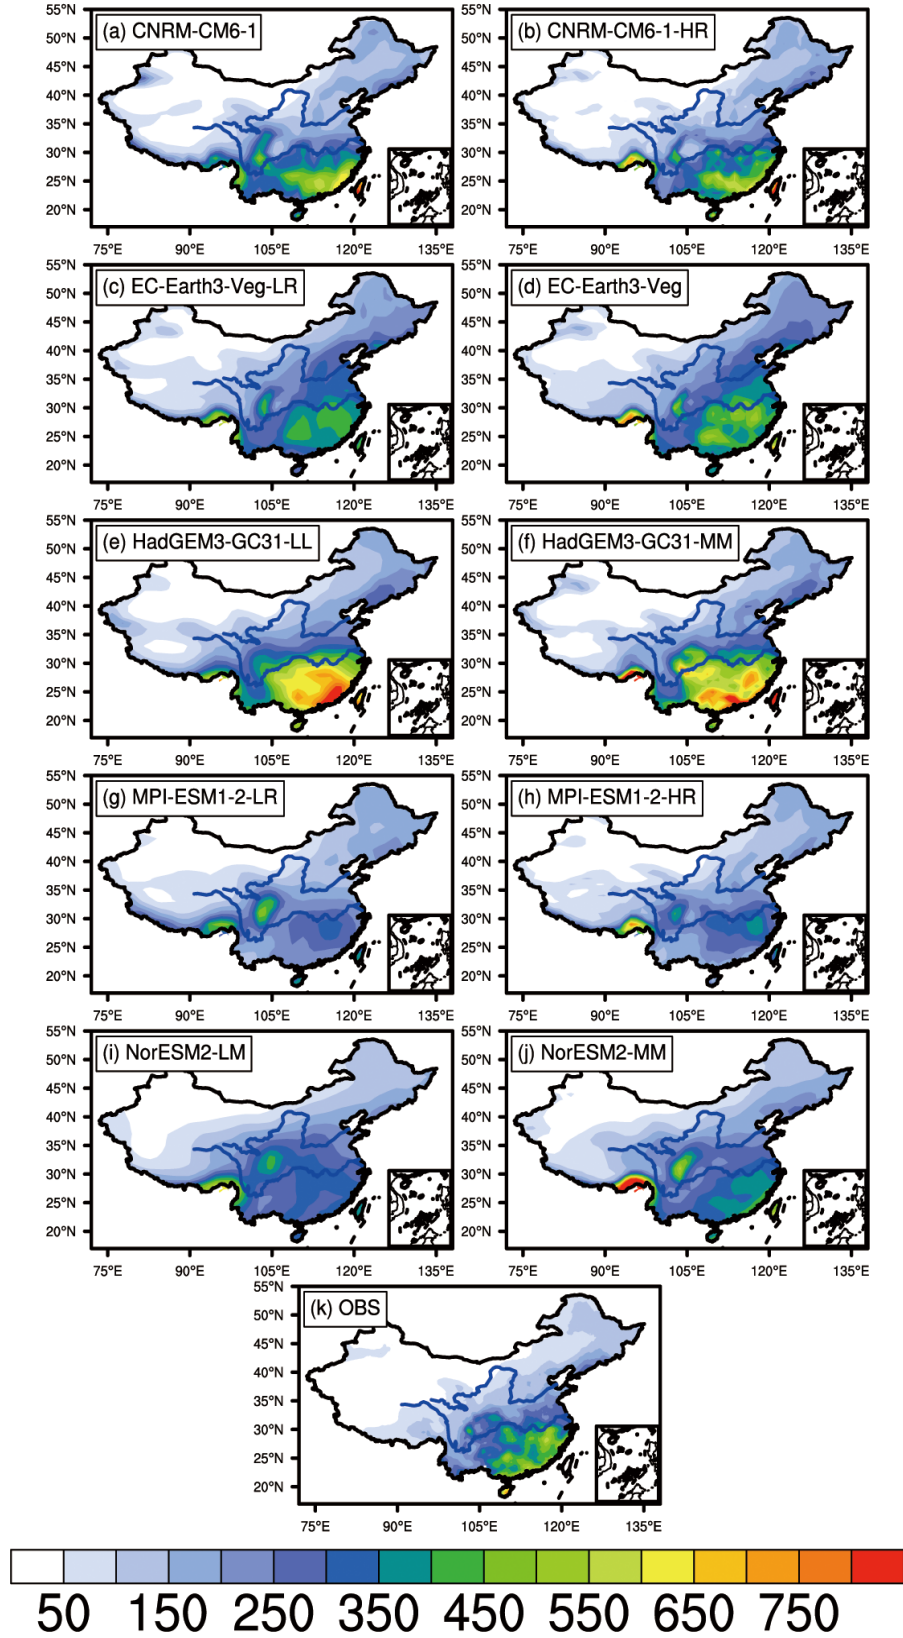

**Figure S1.** Spatial distribution of R95p (unit: mm) for long-term mean (1995-2014) from individual models (a-j) and observation (k).

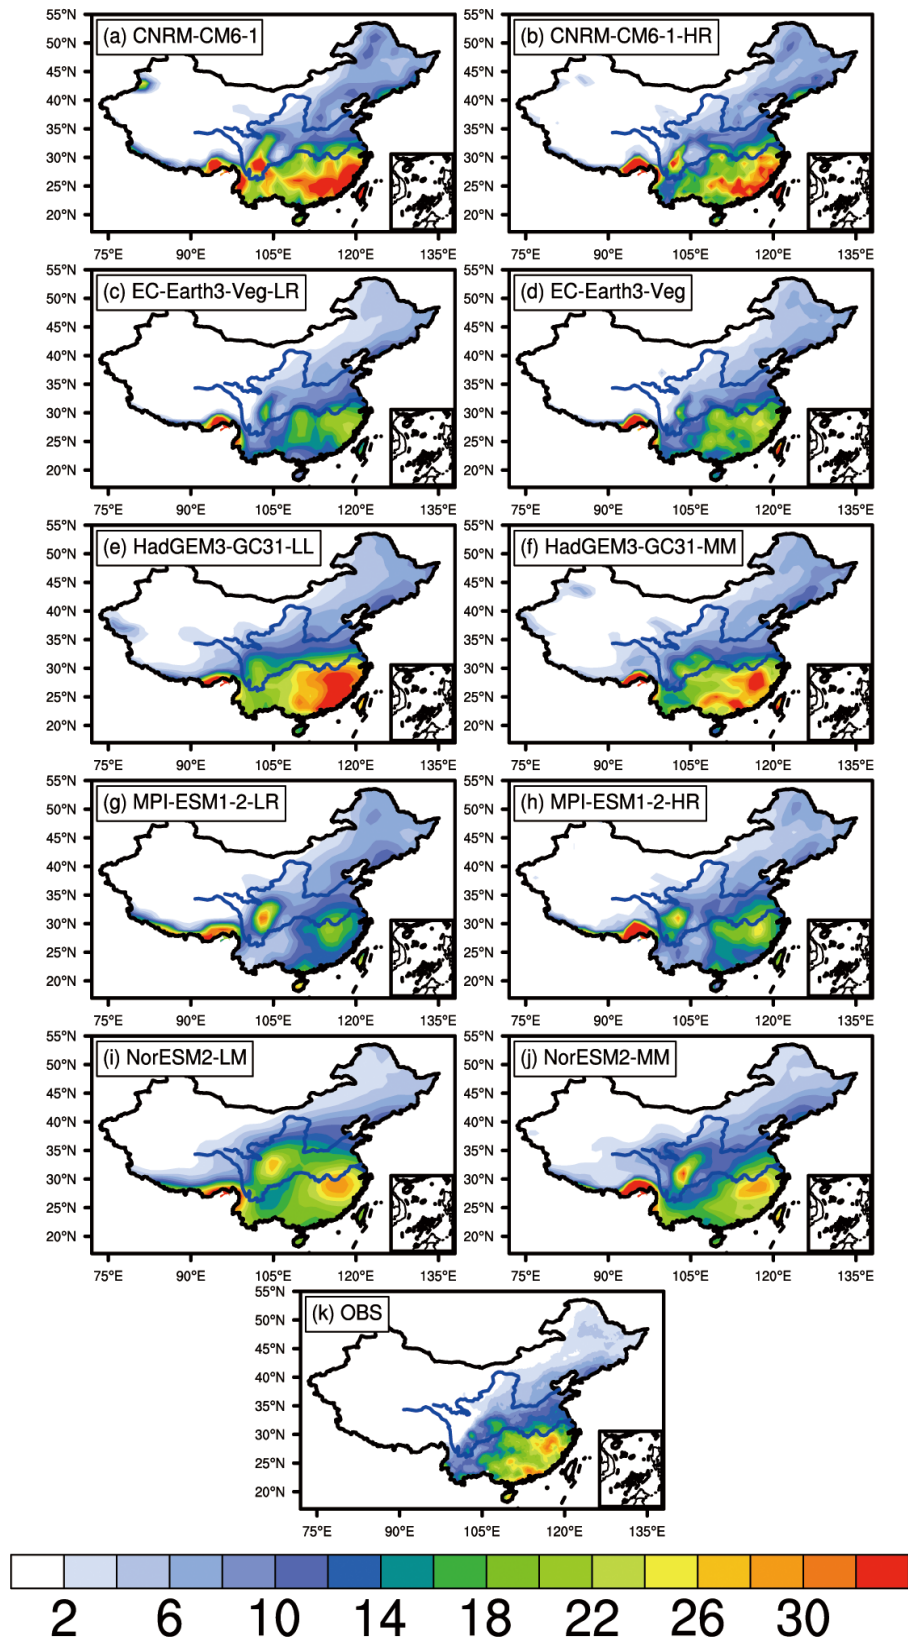

**Figure S2.** Spatial distribution of R20mm (unit: days) for long-term mean (1995-2014) from individual models (a-j) and observation (k).

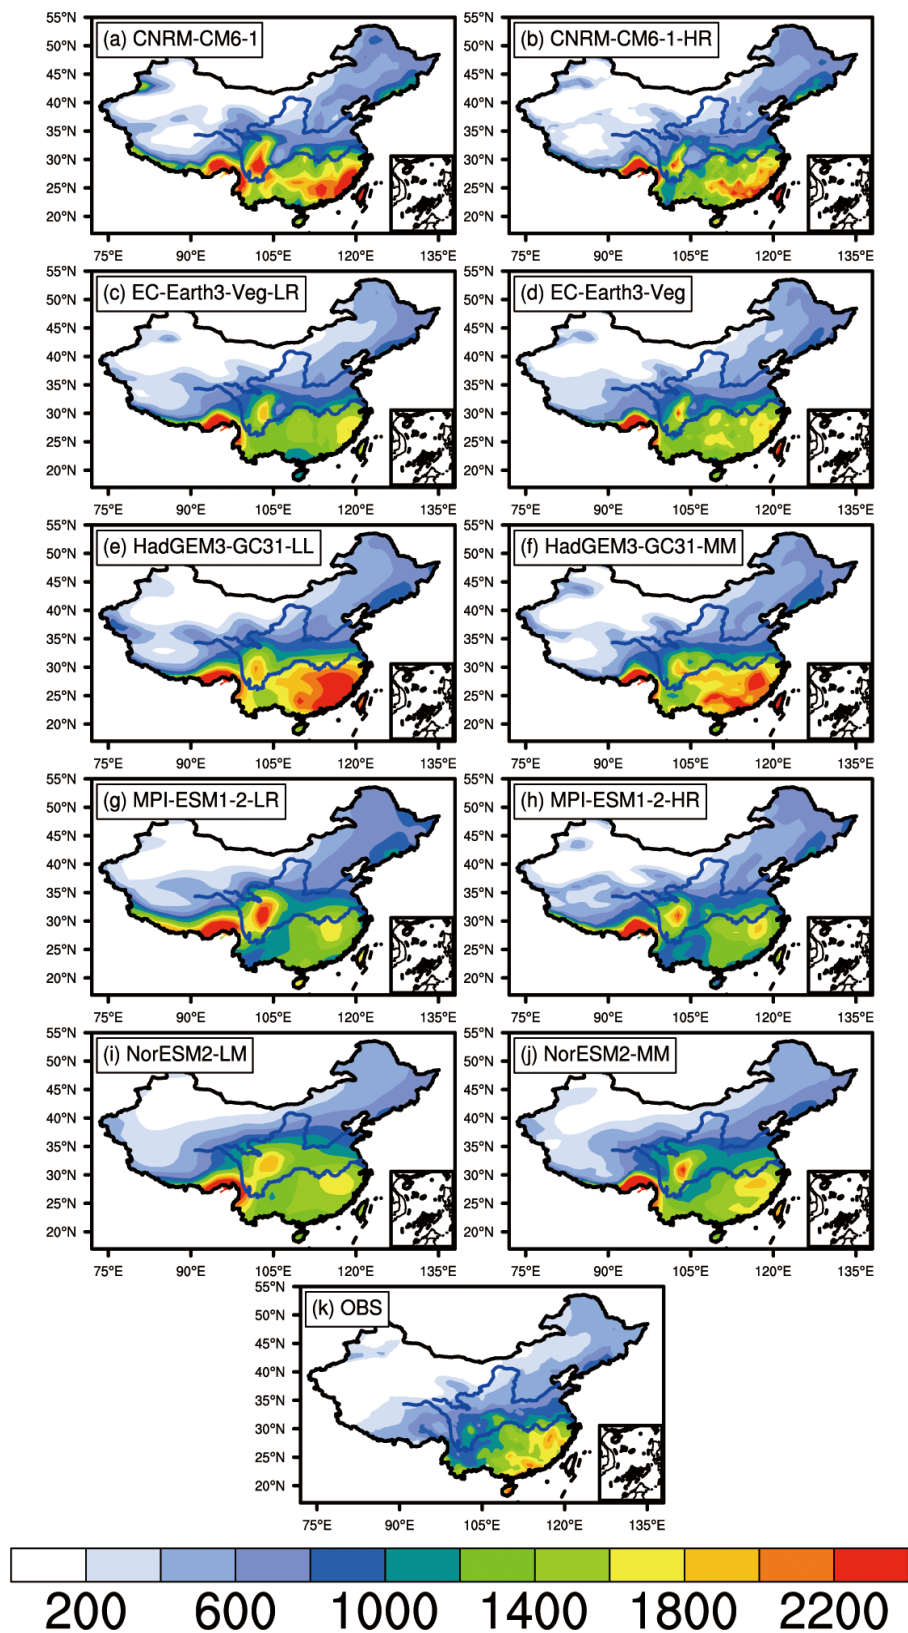

**Figure S3.** Spatial distribution of PRCPTOT (unit: mm) for long-term mean (1995-2014) from individual models (a-j) and observation (k).

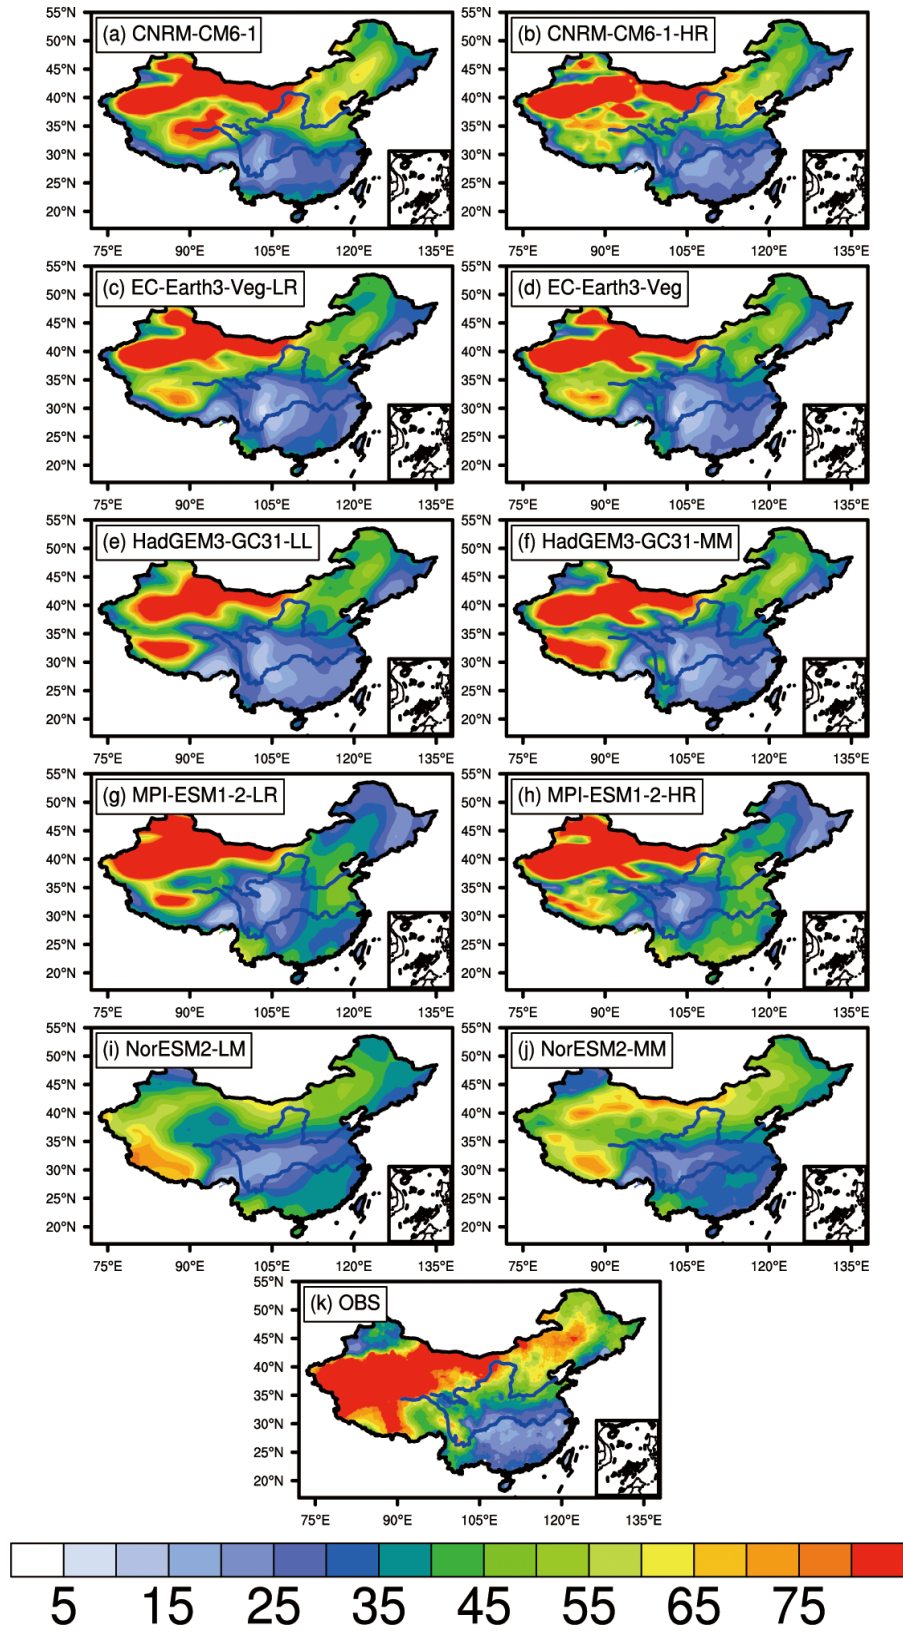

**Figure S4.** Spatial distribution of CDD (unit: days) for long-term mean (1995-2014) from individual models (a-j) and observation (k).
